# Supplementary material
Source: Springer Nature journal article supplement (https://www.springermedizin.de/resource/supplementary/12885_2010_2755_MOESM5_ESM.pdf/9461926)

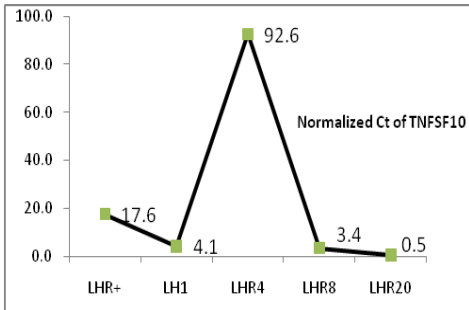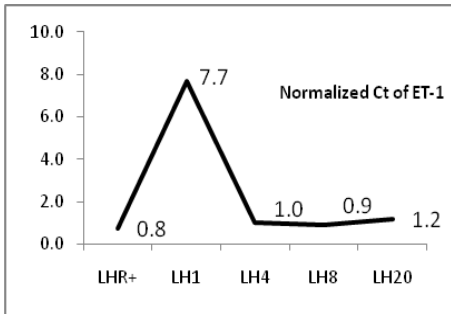

(Ct is normalized by calculating the ratio to that of GAPDH)

Supplement: MOESM5 [file 9461926]
